# Supplementary material
Source: Springer Nature journal article supplement (https://www.springermedizin.de/resource/supplementary/13690_2014_5051_MOESM1_ESM.pdf/9685640)
Supplement: MOESM1 [file 9685640]

**Additional file 1 – Selected platform indicators and measures, with the combinations of variables considered necessary to calculate them**

|                                              | Registry-based indicators and other measures (further data selections by disease, time period and geographic area are implicit) | Combination of variables considered necessary for the computation of the indicator (diagnosis is always considered) (in bold: patient follow-up is required) | Remarks                                                                                                                                                                                                                                                                             |
|----------------------------------------------|---------------------------------------------------------------------------------------------------------------------------------|--------------------------------------------------------------------------------------------------------------------------------------------------------------|-------------------------------------------------------------------------------------------------------------------------------------------------------------------------------------------------------------------------------------------------------------------------------------|
| a) Contribution of RD to morbidity/mortality |                                                                                                                                 |                                                                                                                                                              |                                                                                                                                                                                                                                                                                     |
|                                              | Prevalence, per disease and global*                                                                                             | date of diagnosis; <b>patient city of residence</b>                                                                                                          |                                                                                                                                                                                                                                                                                     |
|                                              | Incidence, per disease and global*                                                                                              | date of diagnosis; date of death; patient city of residence                                                                                                  |                                                                                                                                                                                                                                                                                     |
|                                              | Age at death**                                                                                                                  | Date of birth; Date of death;                                                                                                                                | Required Source: National Death records;                                                                                                                                                                                                                                            |
|                                              | age at disease onset**                                                                                                          | Date of birth; date of onset                                                                                                                                 |                                                                                                                                                                                                                                                                                     |
|                                              | life expectancy at diagnosis***                                                                                                 | date of diagnosis; Date of death;                                                                                                                            |                                                                                                                                                                                                                                                                                     |
|                                              | disability profile**                                                                                                            | <b>Disability scores</b> (health profile from a disability generic questionnaire)                                                                            | Required: agreed reference generic (modular) disability questionnaire among those available; additional use of a reference validated questionnaire specific for the disease or group of diseases is welcome, if available, but it does not support the set of Common Data Elements. |
|                                              | Hospital admissions*                                                                                                            | <b>Hospitalization</b>                                                                                                                                       |                                                                                                                                                                                                                                                                                     |
|                                              | number and types of transplantations**                                                                                          | <b>transplantation data</b>                                                                                                                                  |                                                                                                                                                                                                                                                                                     |
|                                              | number and type of surgeries recorded***                                                                                        | <b>Surgeries data</b>                                                                                                                                        |                                                                                                                                                                                                                                                                                     |
|                                              | number of RD actually diagnosed (and recorded) per Country and per Centre§                                                      | diagnosis                                                                                                                                                    |                                                                                                                                                                                                                                                                                     |
|                                              |                                                                                                                                 |                                                                                                                                                              |                                                                                                                                                                                                                                                                                     |
| b) Socio-economic impact                     |                                                                                                                                 |                                                                                                                                                              |                                                                                                                                                                                                                                                                                     |
|                                              | Health-related Quality of Life index**                                                                                          | <b>HRQoL index (utility) score</b>                                                                                                                           | Required: agreed validated reference generic QoL questionnaire among those available.<br>Required source: patients, possibly assisted by their association or by physician/nurse                                                                                                    |
|                                              | number of patients treated per OD per year**                                                                                    | <b>OD treatment</b>                                                                                                                                          |                                                                                                                                                                                                                                                                                     |
|                                              | other cases in the family**                                                                                                     | Diagnosis of the relative case                                                                                                                               |                                                                                                                                                                                                                                                                                     |
|                                              | healthy carriers in the family**                                                                                                | Genetic features of the family                                                                                                                               |                                                                                                                                                                                                                                                                                     |
|                                              | Contribution of consanguinity                                                                                                   | case parents are consanguineous                                                                                                                              |                                                                                                                                                                                                                                                                                     |

|                                                  |                                                                                                                    |                                                                                                                                                                                                                        |                                                                                                                                                       |
|--------------------------------------------------|--------------------------------------------------------------------------------------------------------------------|------------------------------------------------------------------------------------------------------------------------------------------------------------------------------------------------------------------------|-------------------------------------------------------------------------------------------------------------------------------------------------------|
|                                                  | Impact on education***                                                                                             | highest education level attained                                                                                                                                                                                       |                                                                                                                                                       |
|                                                  | Impact on occupation***                                                                                            | occupational status                                                                                                                                                                                                    |                                                                                                                                                       |
|                                                  |                                                                                                                    |                                                                                                                                                                                                                        |                                                                                                                                                       |
| c) (Availability of appropriate) Health Services |                                                                                                                    |                                                                                                                                                                                                                        |                                                                                                                                                       |
|                                                  | effectiveness of neonatal screening programs§ (sensitivity)                                                        | neonatal screening results                                                                                                                                                                                             |                                                                                                                                                       |
|                                                  | effectiveness of neonatal screening programs§ (positive predictive value)                                          | neonatal screening results                                                                                                                                                                                             | Required Source: registries including suspect patients                                                                                                |
|                                                  | time from disease onset (where reliably feasible) to confirmed diagnosis**                                         | Date of onset; date of diagnosis                                                                                                                                                                                       |                                                                                                                                                       |
|                                                  | time from 1st report to the health service to confirmed diagnosis**                                                | Date of first report to the health service; date of diagnosis                                                                                                                                                          |                                                                                                                                                       |
|                                                  | ODs actually used (and recorded)§                                                                                  | <b>OD treatment</b>                                                                                                                                                                                                    |                                                                                                                                                       |
|                                                  | number of patients treated per ODs§                                                                                | <b>OD treatment</b>                                                                                                                                                                                                    |                                                                                                                                                       |
|                                                  | patients' mobility for diagnosis***                                                                                | Diagnosis centre city; patient residence city                                                                                                                                                                          |                                                                                                                                                       |
|                                                  | patients' mobility for treatment***                                                                                | <b>Treating centre city; patient residence city</b>                                                                                                                                                                    |                                                                                                                                                       |
|                                                  | Number and directory of centres actually making diagnosis§                                                         | ID of Diagnosis Centre                                                                                                                                                                                                 |                                                                                                                                                       |
|                                                  | Activity of centres actually making diagnosis (diseases diagnosed and number of diagnoses per year)§               | date of diagnosis; ID of Diagnosis Centre                                                                                                                                                                              |                                                                                                                                                       |
|                                                  | Number and directory of treatment centres§                                                                         | <b>ID of Treatment Centre</b>                                                                                                                                                                                          |                                                                                                                                                       |
|                                                  | Activity of treatment centres (diseases treated and number of treated patients per year)§                          | <b>ID of Treatment Centre</b>                                                                                                                                                                                          | indicated by the RDTF WG as a possibly better indicator; requires the date of record update                                                           |
|                                                  |                                                                                                                    |                                                                                                                                                                                                                        |                                                                                                                                                       |
| d) Information, research, technology development |                                                                                                                    |                                                                                                                                                                                                                        |                                                                                                                                                       |
|                                                  | indicators supporting cohort selection and patient recruitment for CT***                                           | One example of many possible: genetic variation; <b>patient's willingness to participate; patient contact information; comorbidity.</b> Additional/alternative <b>disease-specific clinical data</b> may be necessary. |                                                                                                                                                       |
|                                                  | indicators based on disease-specific clinical data (e.g. clinical care benchmarks)                                 | E.g.: Combinations of <b>disease-specific clinical data</b> and <b>treatment data</b>                                                                                                                                  |                                                                                                                                                       |
|                                                  |                                                                                                                    |                                                                                                                                                                                                                        |                                                                                                                                                       |
| e) Equity, EU initiatives                        |                                                                                                                    |                                                                                                                                                                                                                        |                                                                                                                                                       |
|                                                  | no specific indicators, but comparisons of the defined indicators calculated in the relevant subgroups of patients |                                                                                                                                                                                                                        | additional data elements required: patient residence Country; diagnosis centre ID (and city and Country); treatment centre ID (and city and Country); |

|                                                                                                            |                                        |                                    |                                                                                                                                                                                  |
|------------------------------------------------------------------------------------------------------------|----------------------------------------|------------------------------------|----------------------------------------------------------------------------------------------------------------------------------------------------------------------------------|
|                                                                                                            | Health-related Quality of Life index** | <b>HRQoL index (utility) score</b> | Required: agreed validated reference generic QoL questionnaire among those available.<br>Required source: patients, possibly assisted by their association or by physician/nurse |
| *These indicators were considered by the RDTF particularly important for surveillance of status and trends |                                        |                                    |                                                                                                                                                                                  |
| § EUROPLAN indicators                                                                                      |                                        |                                    |                                                                                                                                                                                  |
| **These measures are the proposed alternates to the indicators considered by the RDTF                      |                                        |                                    |                                                                                                                                                                                  |
| ***These are additional measures considered by EPIRARE                                                     |                                        |                                    |                                                                                                                                                                                  |
